# Supplementary material for: Red filter meibography by smartphones in patients with meibomian gland dysfunction: a validity and reliability study
Source: PubMed Central journal article supplement — BMJ Open Ophthalmol. 2024 Apr 12;9(1):e001266. doi: 10.1136/bmjophth-2023-001266 (PMC11029186; doi:10.1136/bmjophth-2023-001266), 2024-04-12
Supplement: bmjophth-2023-001266supp001.pdf [file bmjophth-2023-001266supp001.pdf]

**Supplemental Table 1.** Inter-rater reliability of meiboscore assessment

|                              | Meiboscore          | Kappa value (95% CI)  | p-value |
|------------------------------|---------------------|-----------------------|---------|
| OCULUS<br>Keratograph®<br>5M | Lower lid           | 0.197 (0.036-0.358)   | 0.005   |
|                              | Upper lid           | 0.461 (0.315-0.610)   | 0.001   |
|                              | Lower and upper lid | 0.209 (0.062-0.352)   | 0.001   |
| Smartphone 1<br>(Samsung S9) | Lower lid           | -0.061 (-0.205-0.070) | 0.357   |
|                              | Upper lid           | 0.181 (0.05-0.35)     | 0.007   |
|                              | Lower and upper lid | -0.007 (-0.102-0.087) | 0.896   |
| Smartphone 2<br>(iPhone XR)  | Lower lid           | 0.329 (0.122-0.522)   | 0.001   |
|                              | Upper lid           | 0.077 (0.013-0.168)   | 0.085   |
|                              | Lower and upper lid | 0.334 ( 0.169-0.491)  | 0.001   |

CI: Confidence Interval
